# Supplementary material for: Chemistry and Bioactivity of the Deep-Water Antarctic Octocoral Alcyonium sp.
Source: MDPI journal article supplement (doi:10.3390/md20090576), 2022-09-14
Supplement: s1 [file s1]

## Supplementary Information

# Chemistry and Bioactivity of the Deep-water Antarctic Coral *Alcyonium* sp.

Anne-Claire D. Limon <sup>1,†</sup>, Hiran M. L. W. Patabendige <sup>2</sup>, Ala Azhari <sup>3</sup>, Xingmin Sun <sup>2</sup>, Dennis E. Kyle <sup>3,‡</sup>,  
 Nerida G. Wilson <sup>4</sup> and Bill J. Baker <sup>1,\*</sup>

<sup>1</sup> Department of Chemistry, University of South Florida, 4202 E. Fowler Avenue, CHE 205, Tampa, FL 33620, USA

<sup>2</sup> Department of Molecular Medicine, Morsani College of Medicine, University of South Florida, 12901 Bruce B. Downs Boulevard, MDC07, Tampa, FL 33612, USA

<sup>3</sup> USF Center for Global Health and Infectious Diseases Research, University of South Florida, 3010 USF Banyan Circle, IDR3 304, Tampa, FL 33612, USA

<sup>4</sup> Collections & Research, Western Australia Museum, 49 Kew Street, Welshpool 6106, Perth and University of Western Australia, 35 Stirling Highway, Crawley 6009, Australia

\* Correspondence: [bjbaker@usf.edu](mailto:bjbaker@usf.edu); Tel.: +1-813-974-1967

† Current address: Department of Chemistry, University of Southern Indiana, 8600 University Boulevard, SC 2255, Evansville, IN 47712, USA.

‡ Current address: Center for Tropical and Emerging Global Diseases, University of Georgia, Athens, GA 30602, USA.

### Table of Contents

|                                                                                                                                                   |   |
|---------------------------------------------------------------------------------------------------------------------------------------------------|---|
| Figure S1. Maximum Likelihood tree topology comparing <i>msh1</i> sequences of our <i>Alcyonium</i> specimen with those available on Genbank..... | 2 |
| Figure S2. <sup>1</sup> H NMR spectrum of alcyopterosin T (1), 500 MHz, CDCl <sub>3</sub> .....                                                   | 3 |
| Figure S3. COSY spectrum of alcyopterosin T (1), 500 MHz, CDCl <sub>3</sub> .....                                                                 | 3 |
| Figure S4. HSQC spectrum of alcyopterosin T (1), 500 MHz, CDCl <sub>3</sub> .....                                                                 | 4 |
| Figure S5. HMBC spectrum of alcyopterosin T (1), 500 MHz, CDCl <sub>3</sub> .....                                                                 | 4 |
| Figure S6. HRESIMS of alcyopterosin T (1).....                                                                                                    | 5 |
| Figure S7. <sup>1</sup> H NMR spectrum of alcyopterosin U (2), 500 MHz, CDCl <sub>3</sub> .....                                                   | 5 |
| Figure S8. COSY spectrum of alcyopterosin U (2), 500 MHz, CDCl <sub>3</sub> .....                                                                 | 6 |
| Figure S9. HSQC spectrum of alcyopterosin U (2), 500 MHz, CDCl <sub>3</sub> .....                                                                 | 6 |
| Figure S10. HMBC spectrum of alcyopterosin U (2), 500 MHz, CDCl <sub>3</sub> .....                                                                | 7 |
| Figure S11. HRESIMS of alcyopterosin U (2). Calculated for C <sub>17</sub> H <sub>21</sub> NO <sub>6</sub> H, 336.1442.....                       | 7 |

|                         |                                                                                                        |                                      |     |      |  |
|-------------------------|--------------------------------------------------------------------------------------------------------|--------------------------------------|-----|------|--|
| Figure S12.             | $^1\text{H}$                                                                                           | NMR spectrum of alcyopterosin V (3), | 500 | MHz, |  |
| CDCl <sub>3</sub> ..... |                                                                                                        |                                      | 8   |      |  |
| Figure S13.             | $^{13}\text{C}$                                                                                        | NMR spectrum of alcyopterosin V (3), | 125 | MHz, |  |
| CDCl <sub>3</sub> ..... |                                                                                                        |                                      | 8   |      |  |
| Figure S14.             | COSY                                                                                                   | spectrum of alcyopterosin V (3),     | 500 | MHz, |  |
| CDCl <sub>3</sub> ..... |                                                                                                        |                                      | 9   |      |  |
| Figure S15.             | HSQC                                                                                                   | spectrum of alcyopterosin V (3),     | 500 | MHz, |  |
| CDCl <sub>3</sub> ..... |                                                                                                        |                                      | 9   |      |  |
| Figure S16.             | HMBC                                                                                                   | spectrum of alcyopterosin V (3),     | 500 | MHz, |  |
| CDCl <sub>3</sub> ..... |                                                                                                        |                                      | 10  |      |  |
| Figure S17.             | HRESIMS                                                                                                | of alcyopterosin V (3).....          | 10  |      |  |
| Figure S18.             | $^1\text{H}$                                                                                           | NMR spectrum of alcyosterone (5),    | 500 | MHz, |  |
| CDCl <sub>3</sub> ..... |                                                                                                        |                                      | 11  |      |  |
| Figure S19.             | $^{13}\text{C}$                                                                                        | NMR spectrum of alcyosterone (5),    | 125 | MHz, |  |
| CDCl <sub>3</sub> ..... |                                                                                                        |                                      | 11  |      |  |
| Figure S20.             | COSY                                                                                                   | spectrum of alcyosterone (5),        | 500 | MHz, |  |
| CDCl <sub>3</sub> ..... |                                                                                                        |                                      | 12  |      |  |
| Figure S21.             | HSQC                                                                                                   | spectrum of alcyosterone (5),        | 500 | MHz, |  |
| CDCl <sub>3</sub> ..... |                                                                                                        |                                      | 12  |      |  |
| Figure S22.             | HMBC                                                                                                   | spectrum of alcyosterone (5),        | 500 | MHz, |  |
| CDCl <sub>3</sub> ..... |                                                                                                        |                                      | 13  |      |  |
| Figure S23.             | HRESIMS                                                                                                | of alcyosterone (5).....             | 13  |      |  |
| Table S1.               | NMR shift comparison between compounds isolated in the current work to those previously published..... |                                      |     |      |  |
|                         |                                                                                                        |                                      | 14  |      |  |
| Table S2.               | Crystal data and structure refinement for alcyosterone (5).....                                        |                                      | 15  |      |  |
| Figure S24.             | Asymmetric unit of alcyosterone (5) .....                                                              |                                      | 15  |      |  |

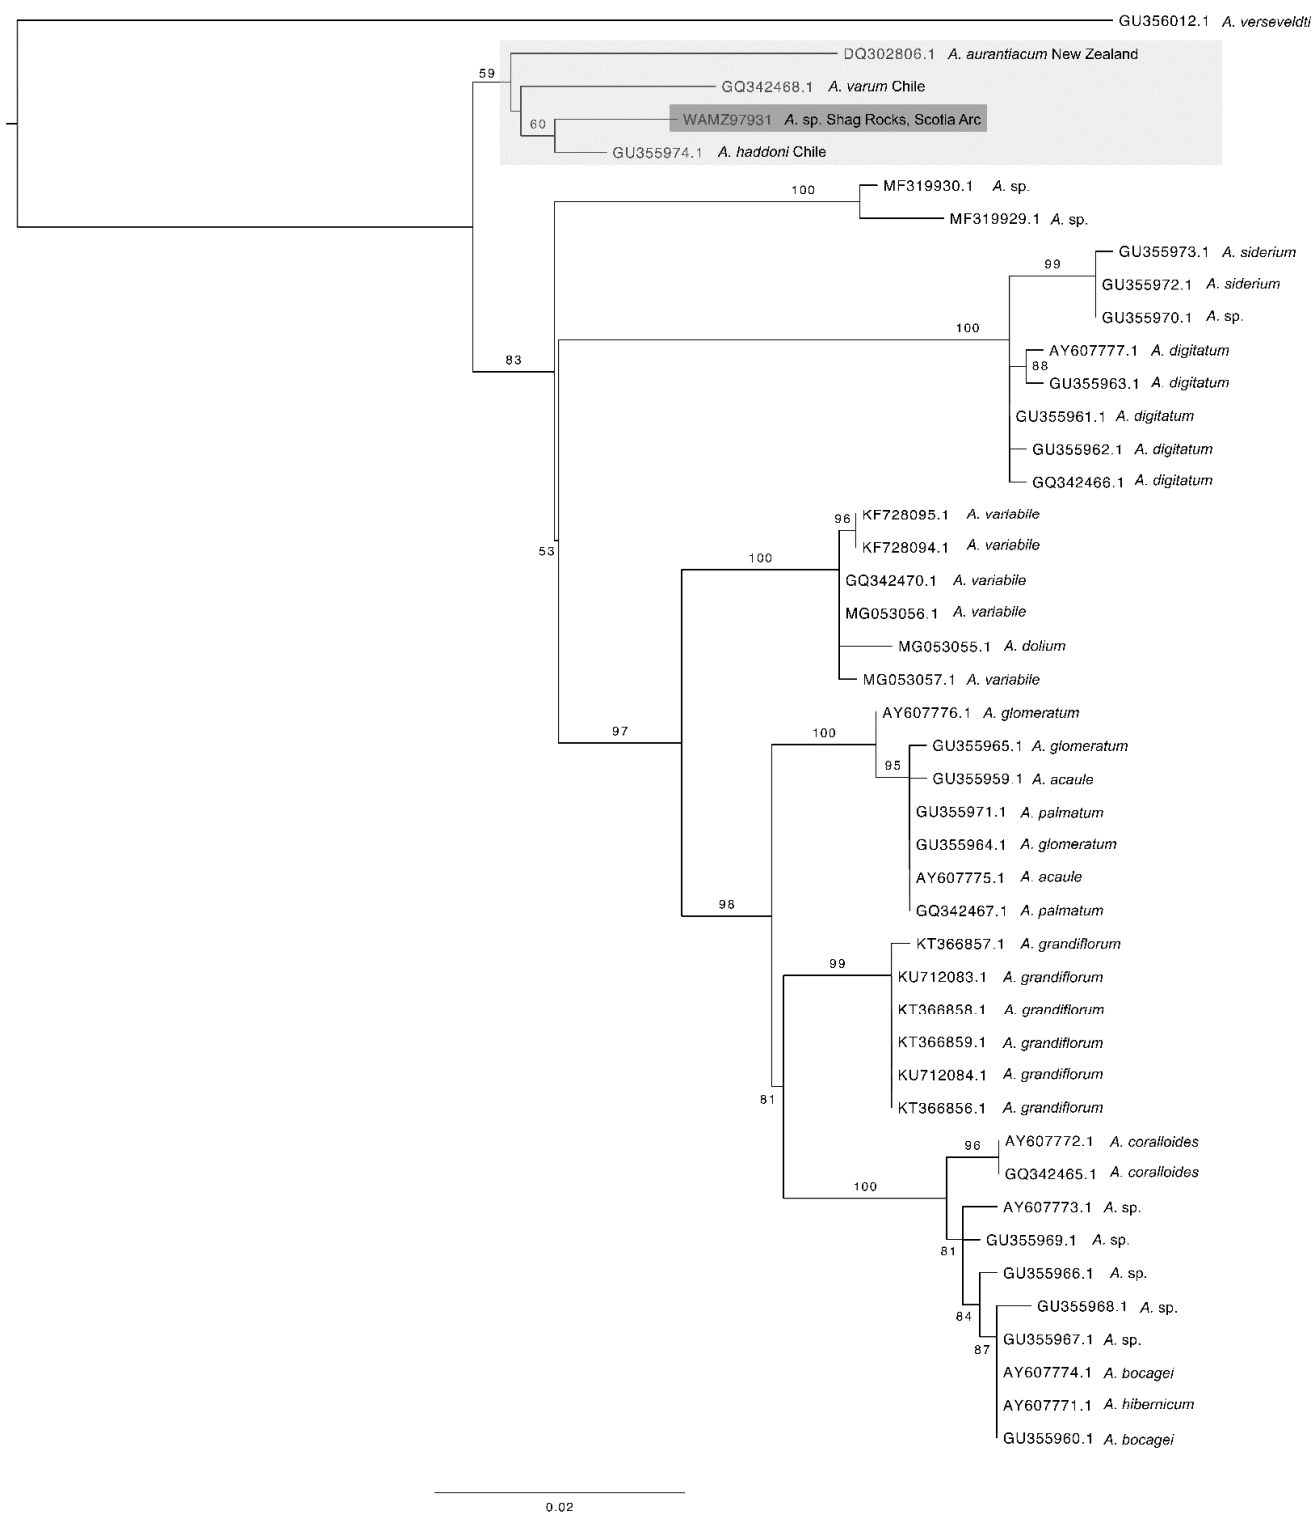

**Figure S1.** Maximum Likelihood tree topology comparing *msh1* sequences of *Alcyonium* specimen with those available on Genbank.

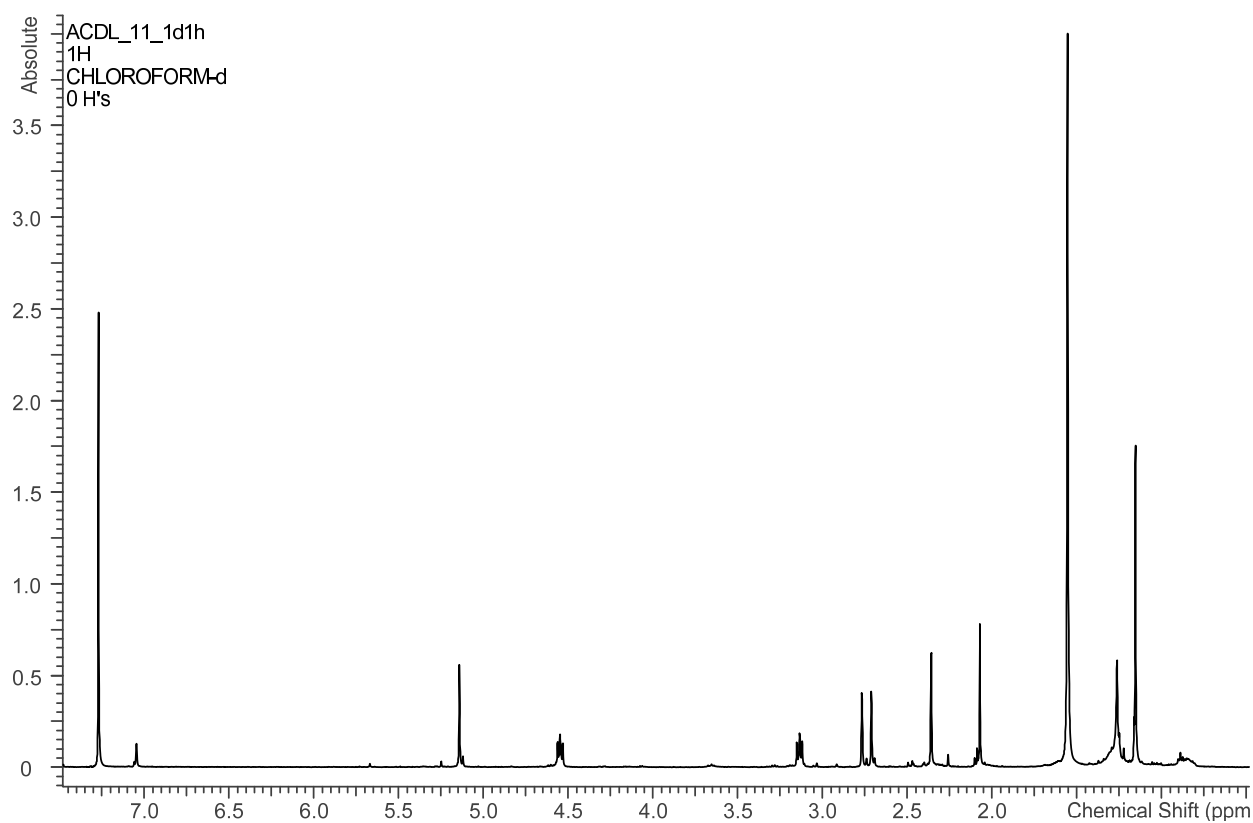

Figure S2.  $^1\text{H}$  NMR spectrum of alcyopterosin T (**1**), 500 MHz,  $\text{CDCl}_3$ .

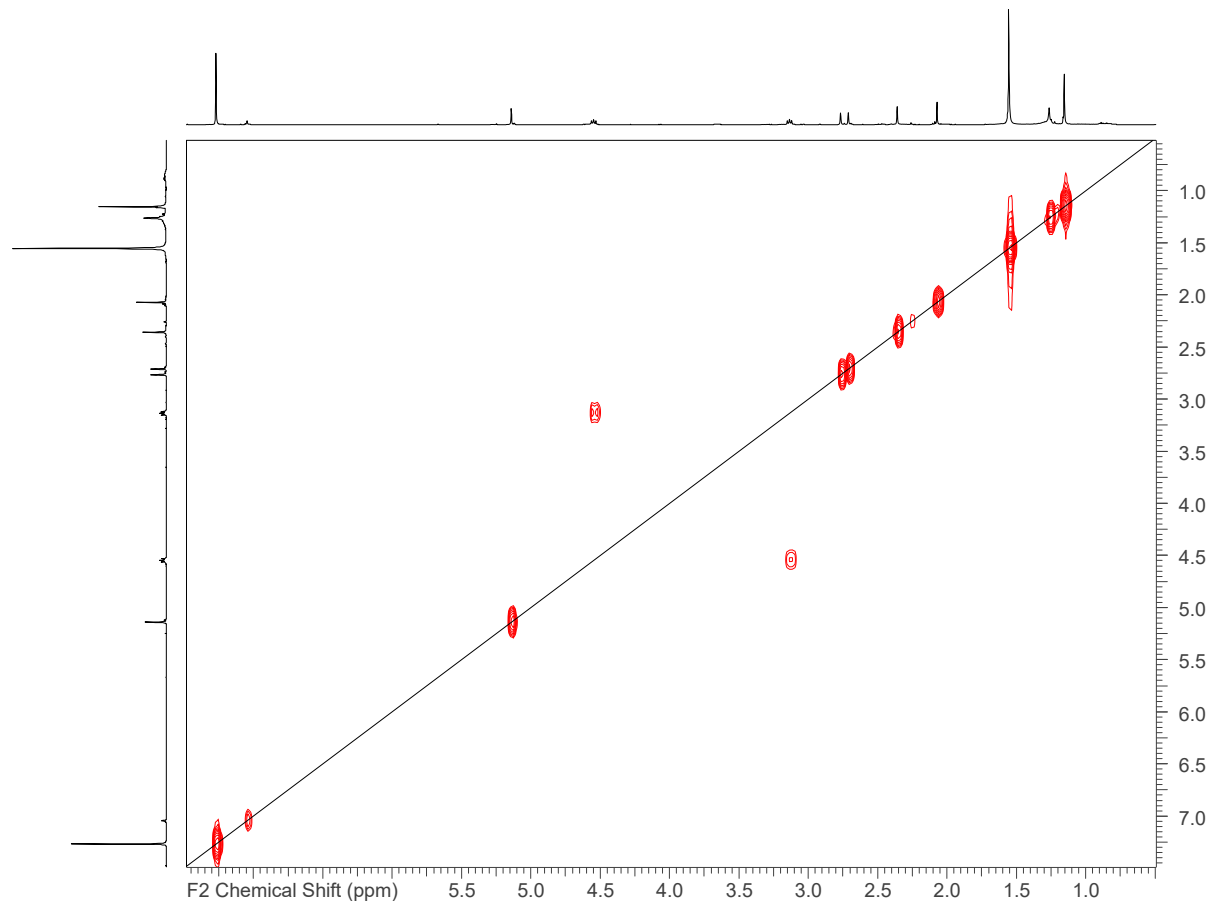

Figure S3. COSY spectrum of alcyopterosin T (**1**), 500 MHz,  $\text{CDCl}_3$ .

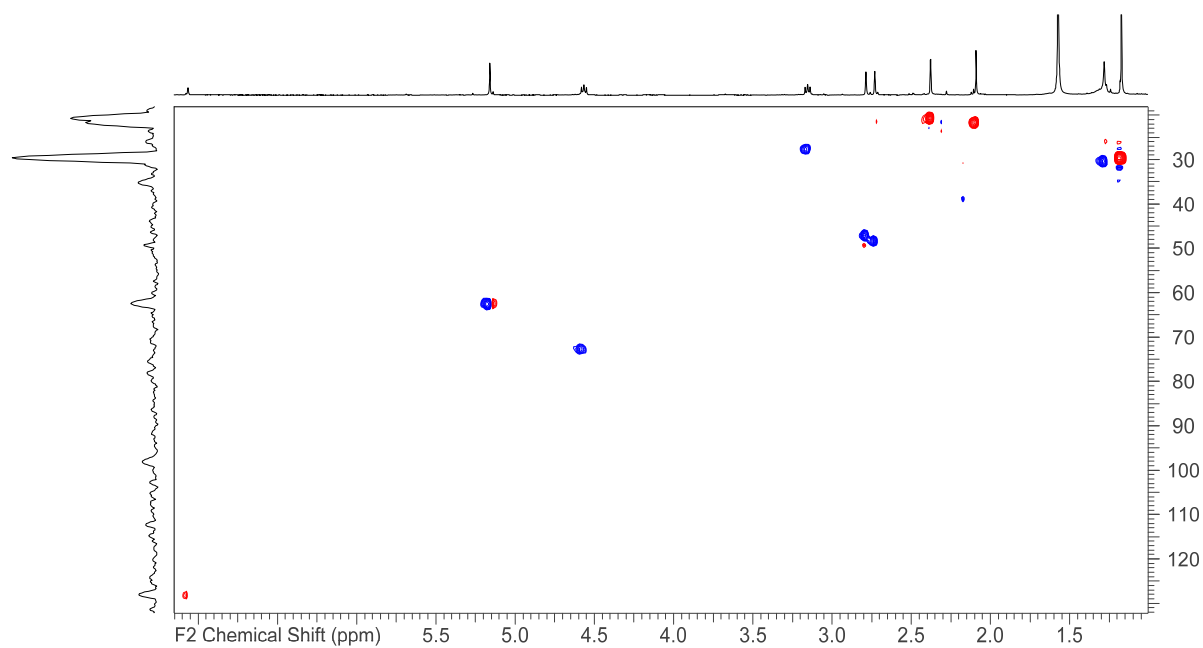

**Figure S4.** HSQC spectrum of alcyopterosin T (**1**), 500 MHz, CDCl<sub>3</sub>.

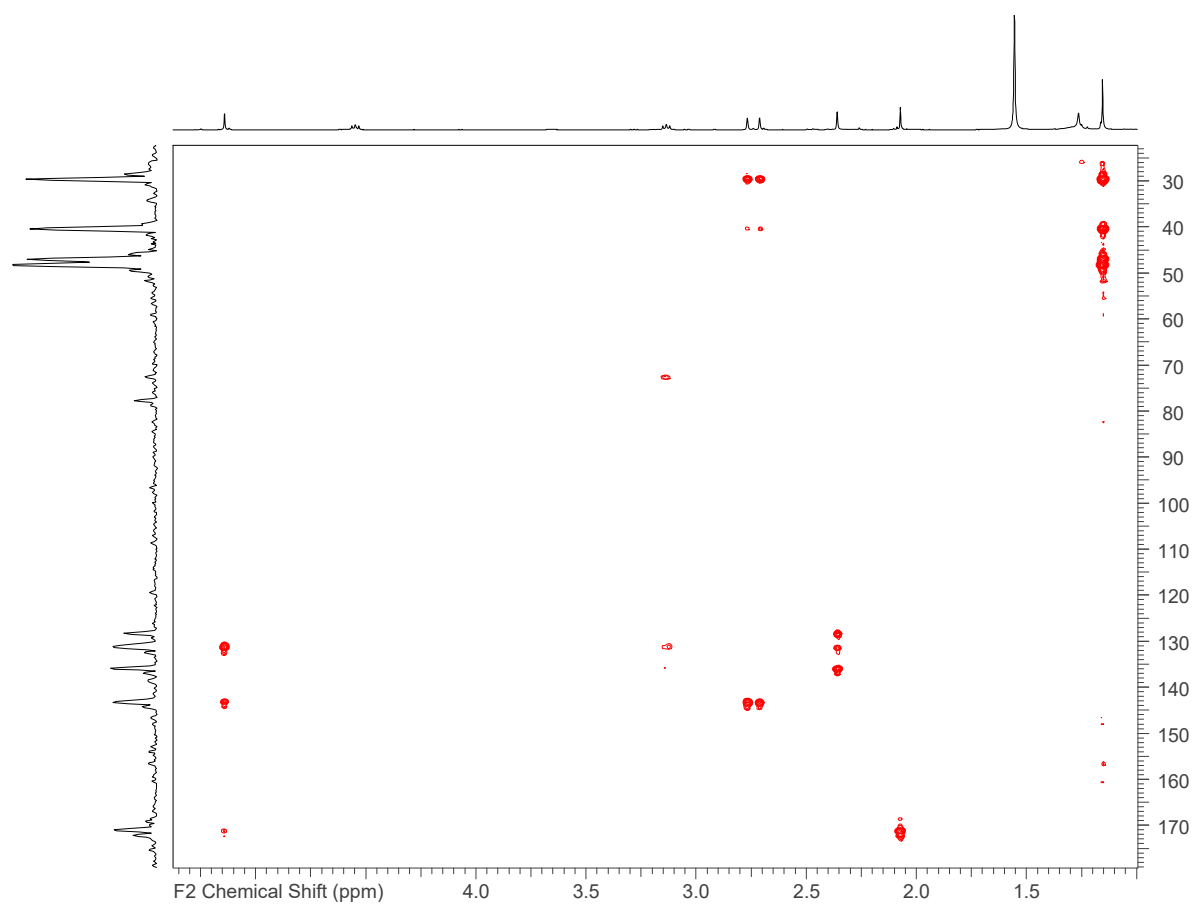

**Figure S5.** HMBC spectrum of alcyopterosin T (**1**), 500 MHz, CDCl<sub>3</sub>.

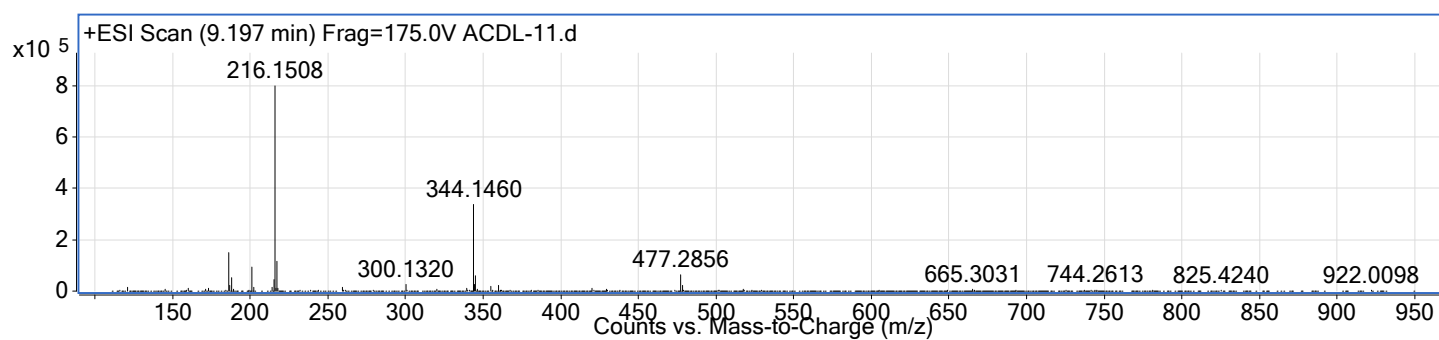

Figure S6. HRESIMS of alcyopterosin T (1). Calculated for  $C_{17}H_{23}NO_5Na$ , 344.1468.

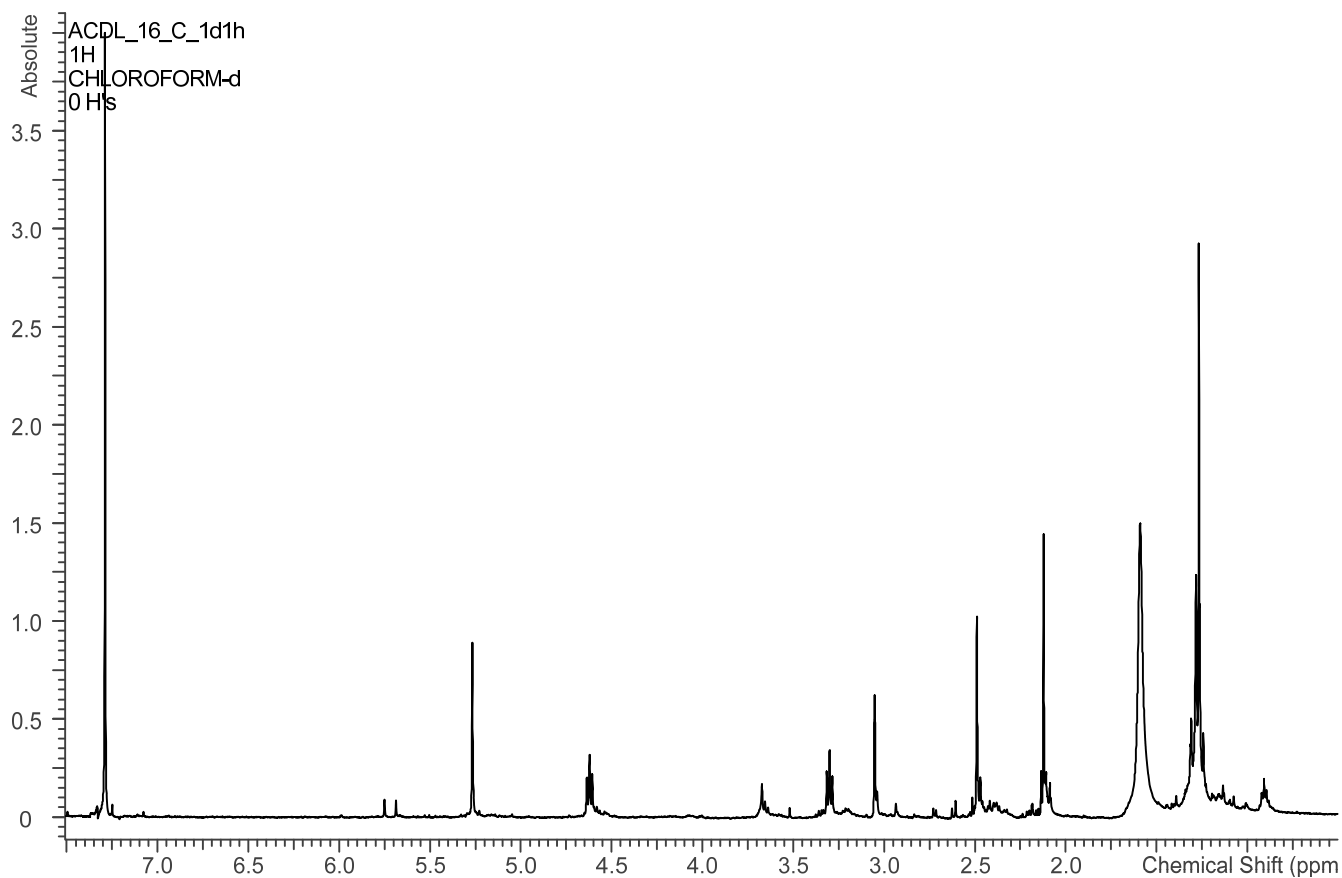

Figure S7.  $^1H$  NMR spectrum of alcyopterosin U (2), 500 MHz,  $CDCl_3$ .

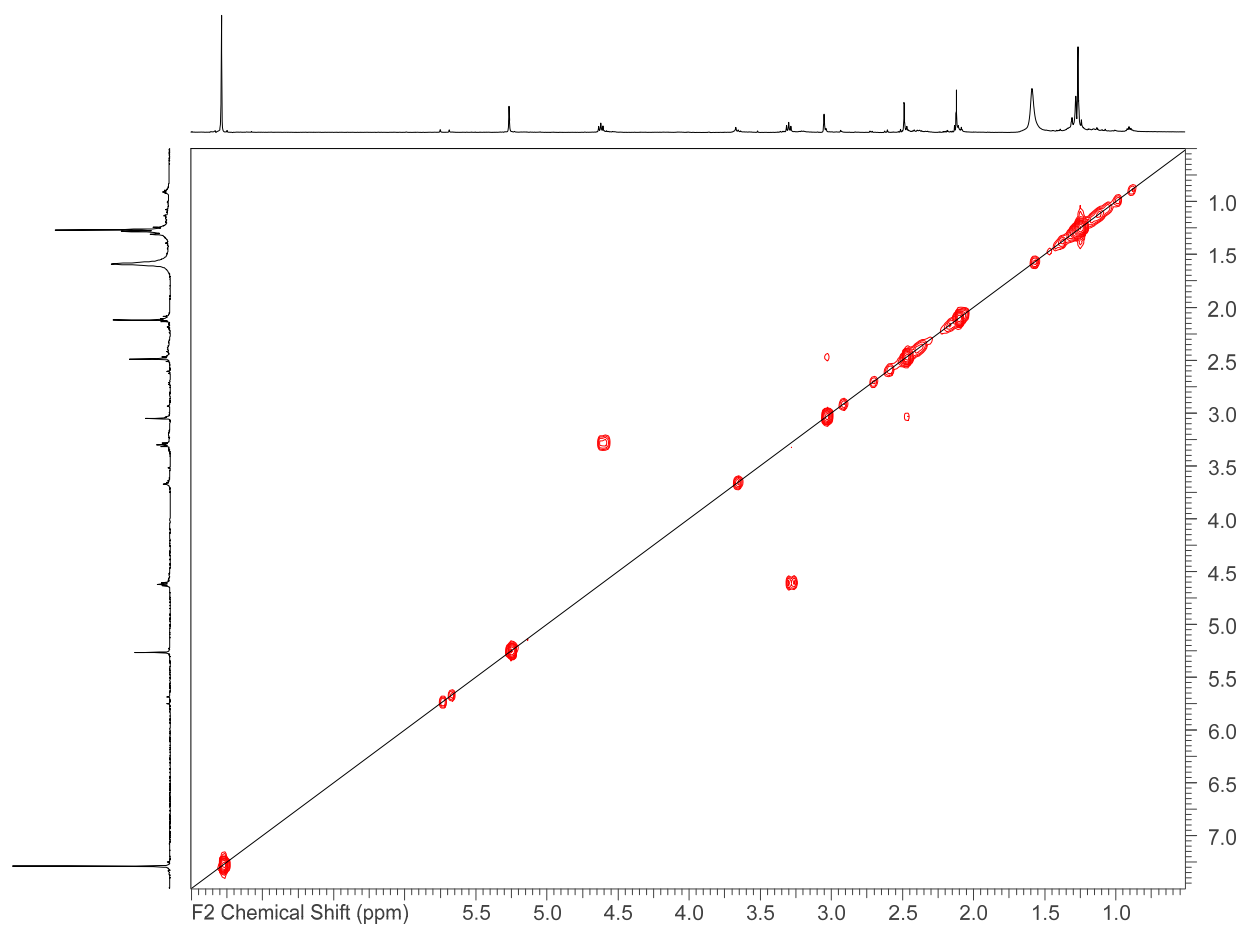

**Figure S8.** COSY spectrum of alcyopterosin U (2), 500 MHz, CDCl<sub>3</sub>.

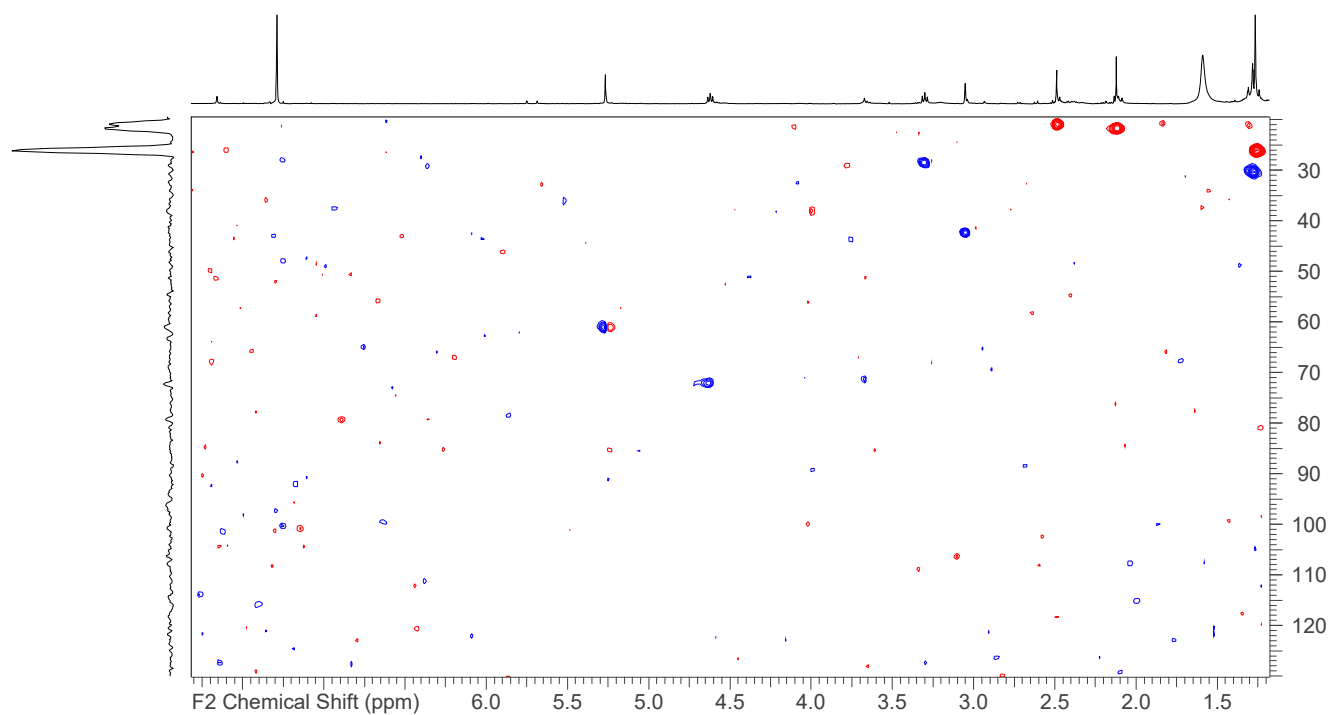

**Figure S9.** HSQC spectrum of alcyopterosin U (2), 500 MHz, CDCl<sub>3</sub>.

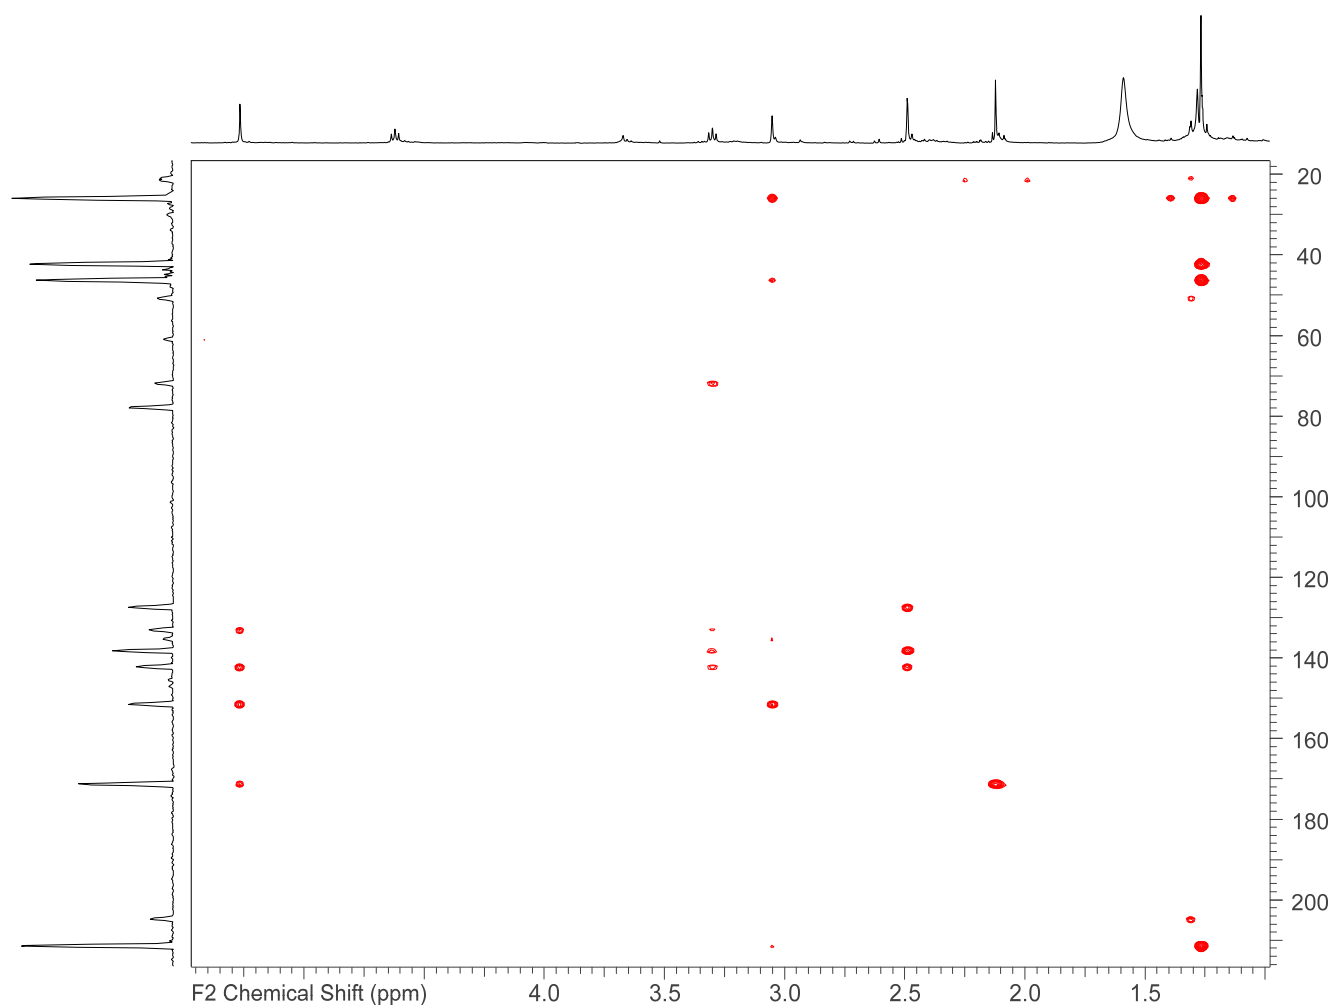

Figure S10. HMBC spectrum of alcyopterosin U (2), 500 MHz, CDCl<sub>3</sub>.

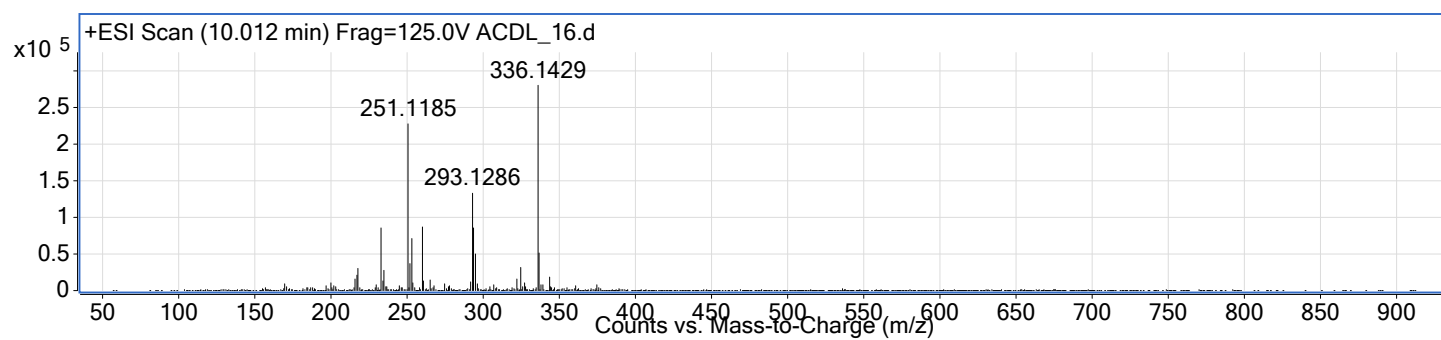

Figure S11. HRESIMS of alcyopterosin U (2). Calculated for C<sub>17</sub>H<sub>21</sub>NO<sub>6</sub>H, 336.1442.



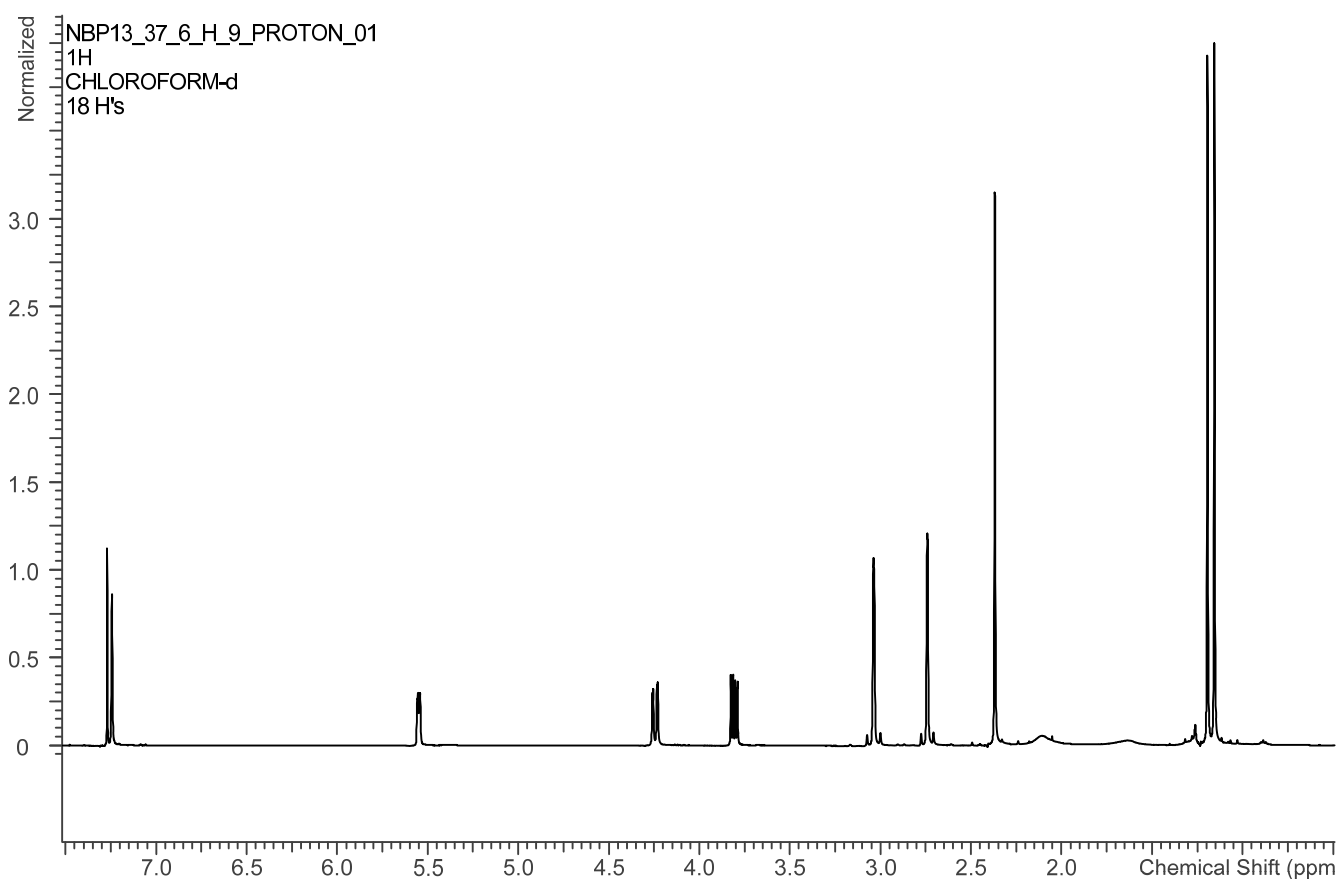

Figure S12.  $^1\text{H}$  NMR spectrum of alcyopterosin V (3), 500 MHz,  $\text{CDCl}_3$ .

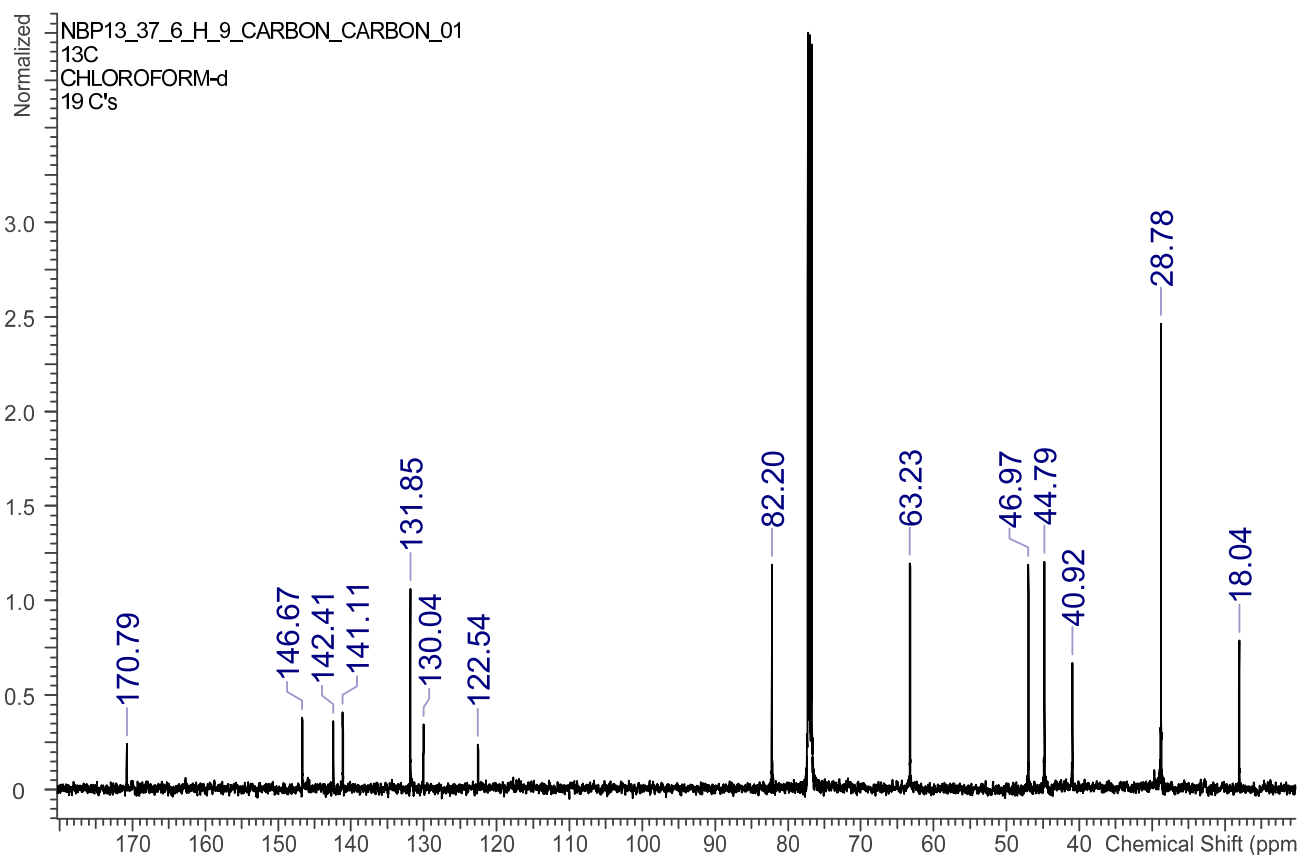

Figure S13.  $^{13}\text{C}$  NMR spectrum of alcyopterosin V (3), 125 MHz,  $\text{CDCl}_3$ .

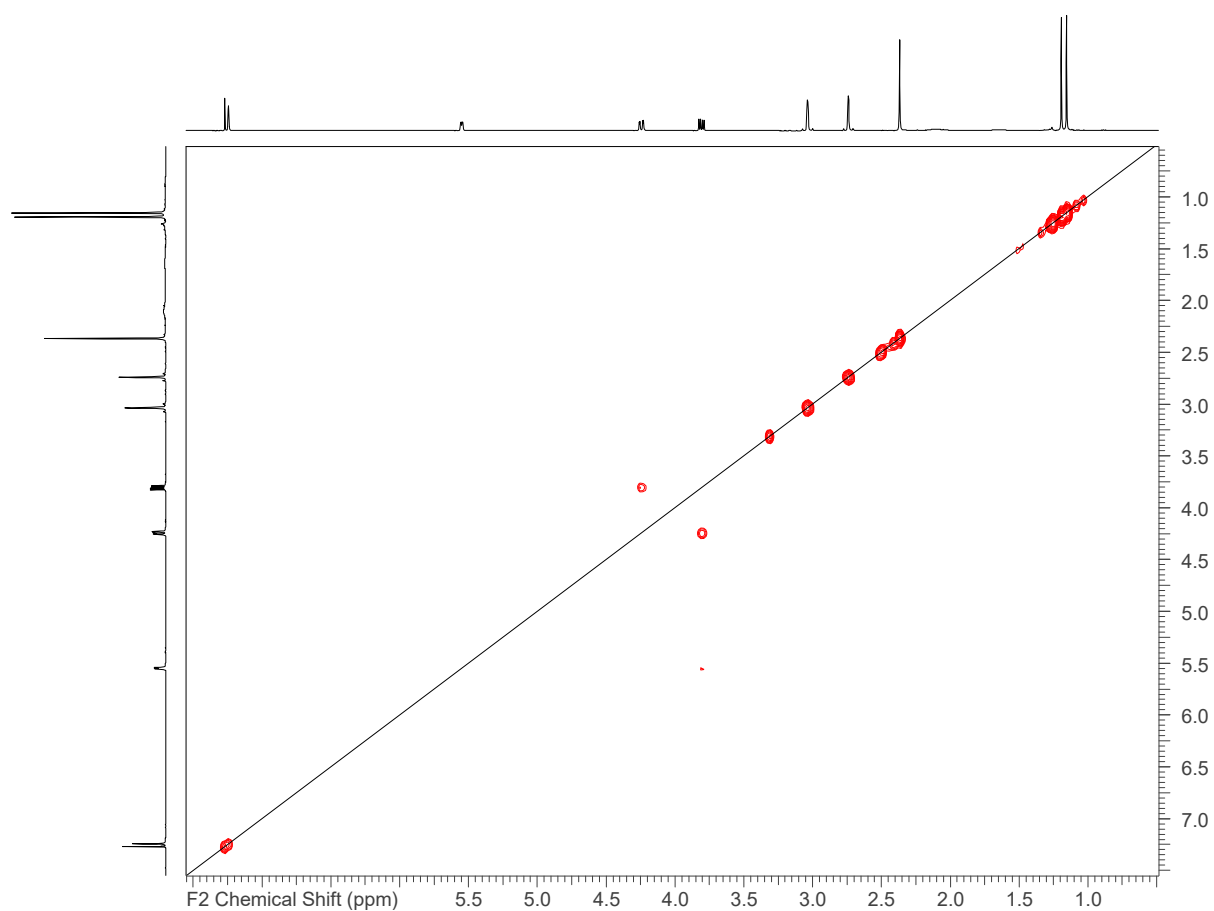

**Figure S14.** COSY spectrum of alcyopterosin V (3), 500 MHz, CDCl<sub>3</sub>.

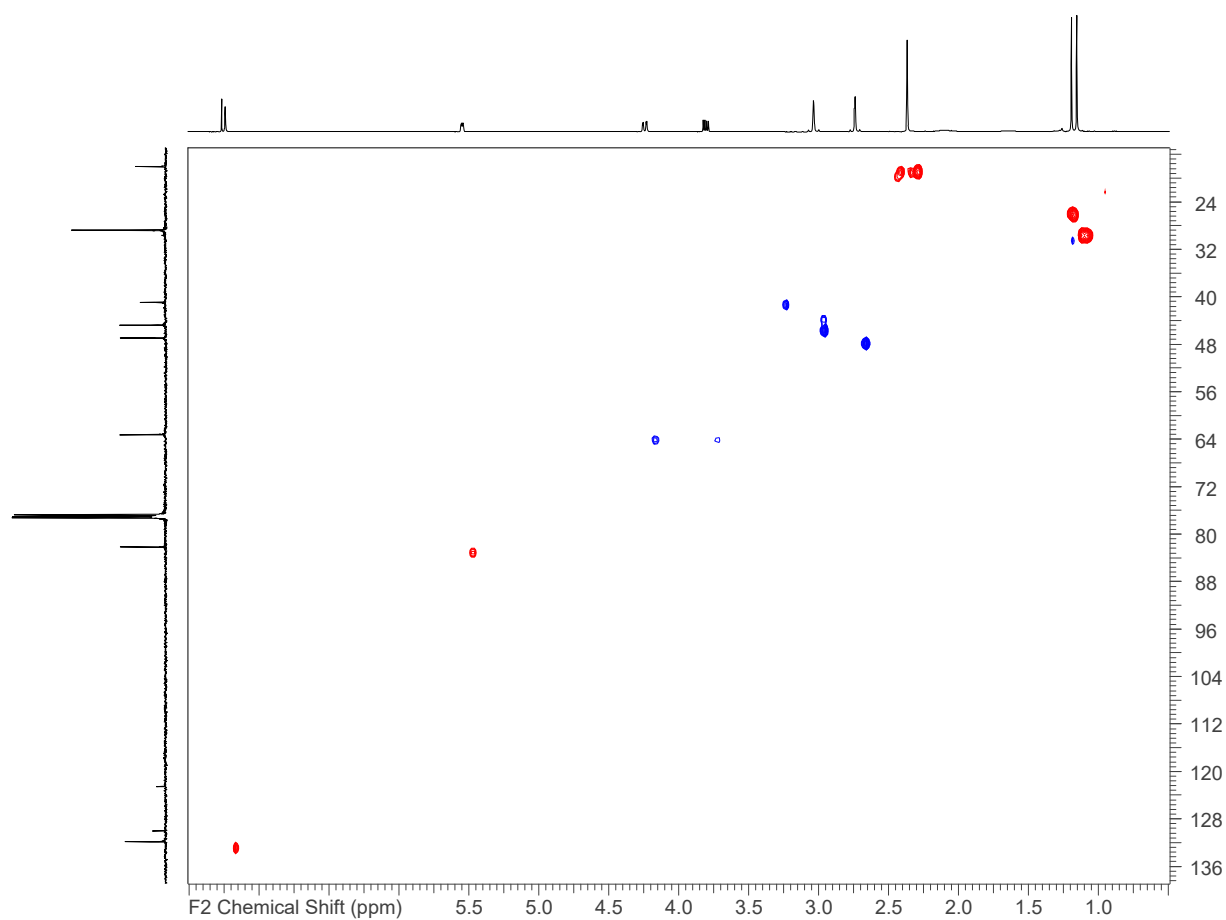

**Figure S15.** HSQC spectrum of alcyopterosin V (3), 500 MHz, CDCl<sub>3</sub>.

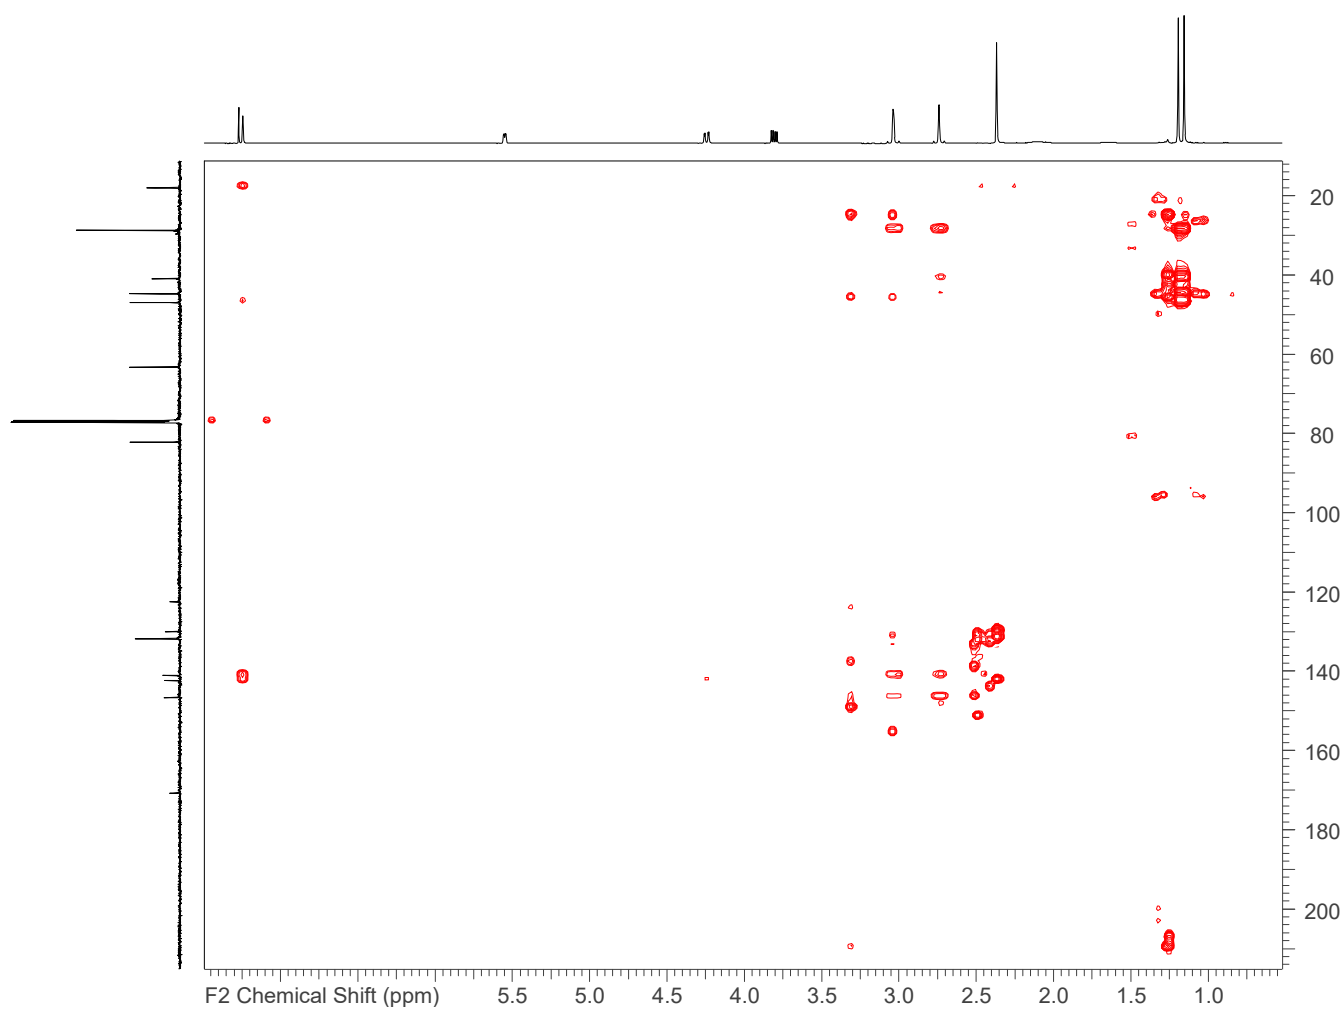

Figure S16. HMBC spectrum of alcyopterosin V (3), 500 MHz, CDCl<sub>3</sub>.

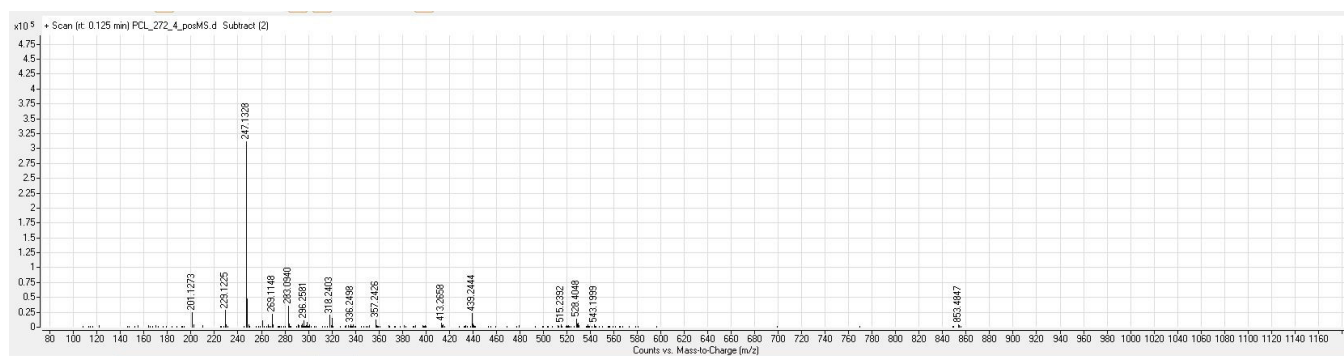

Figure S17. Blank subtracted HRESIMS of alcyopterosin V (3). Calculated for C<sub>15</sub>H<sub>18</sub>O<sub>3</sub>H, 247.1329.

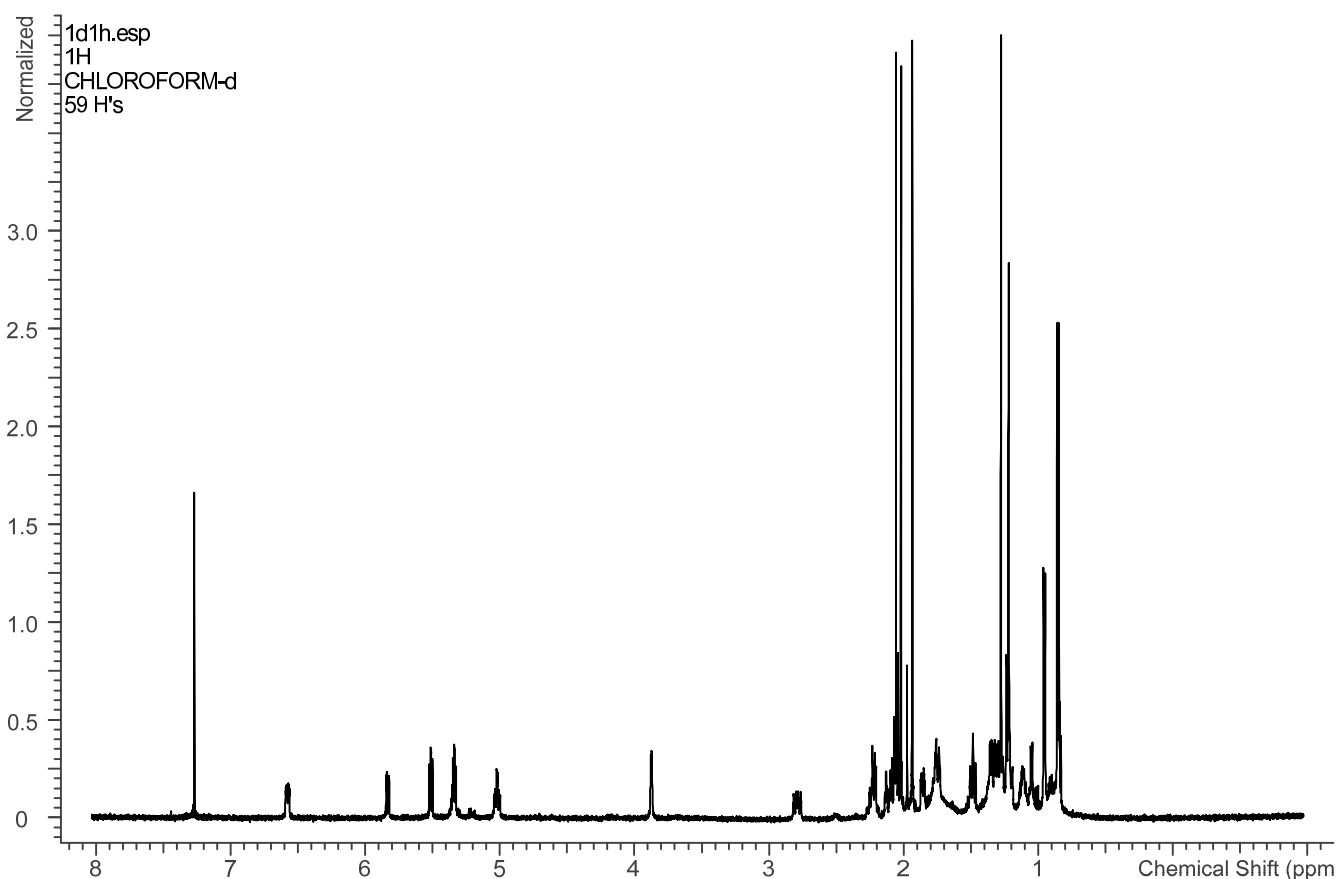

Figure S18. <sup>1</sup>H NMR spectrum of alcyosterone (5), 600 MHz, CDCl<sub>3</sub>.

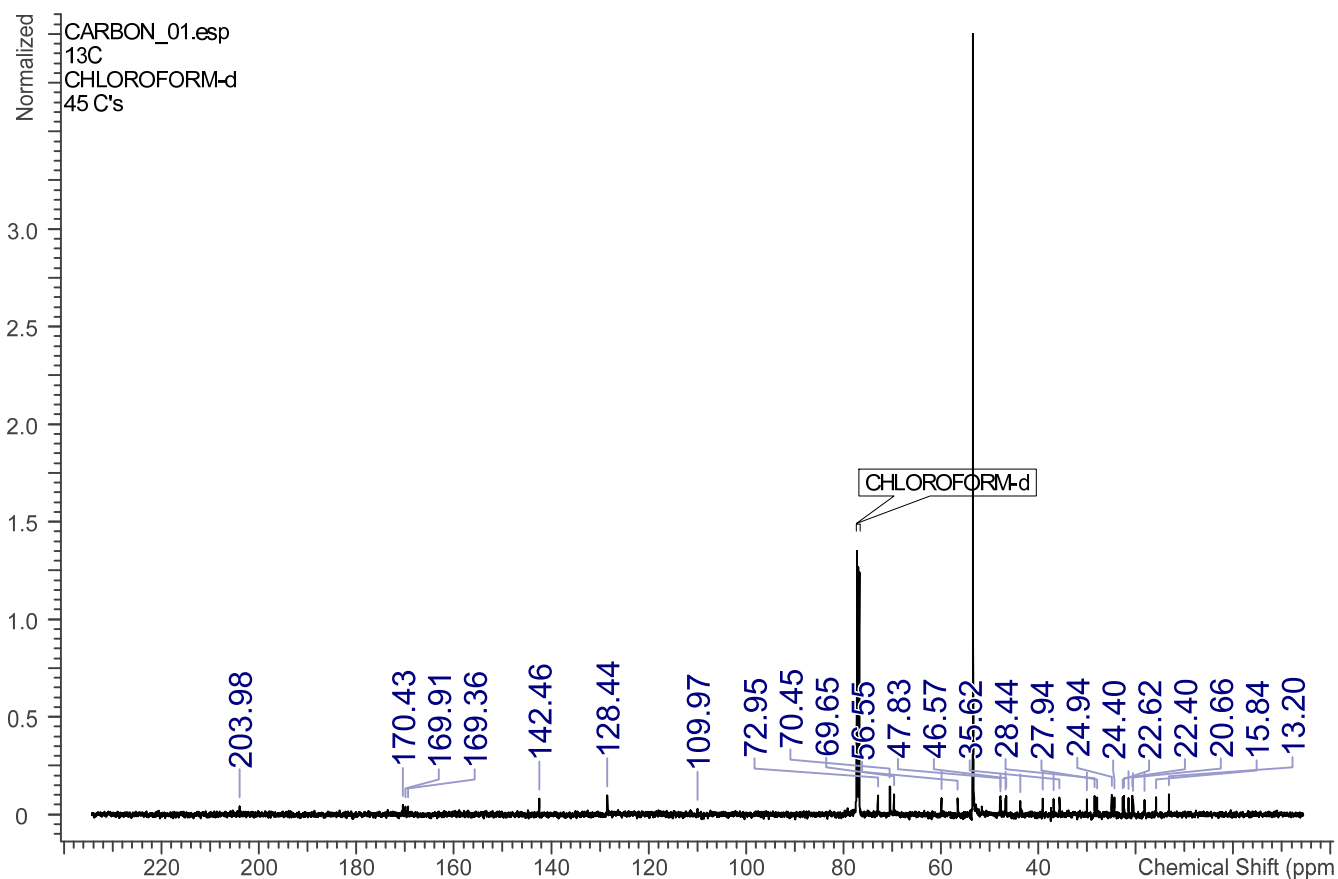

Figure S19. <sup>13</sup>C NMR spectrum of alcyosterone (5), 125 MHz, CDCl<sub>3</sub>.

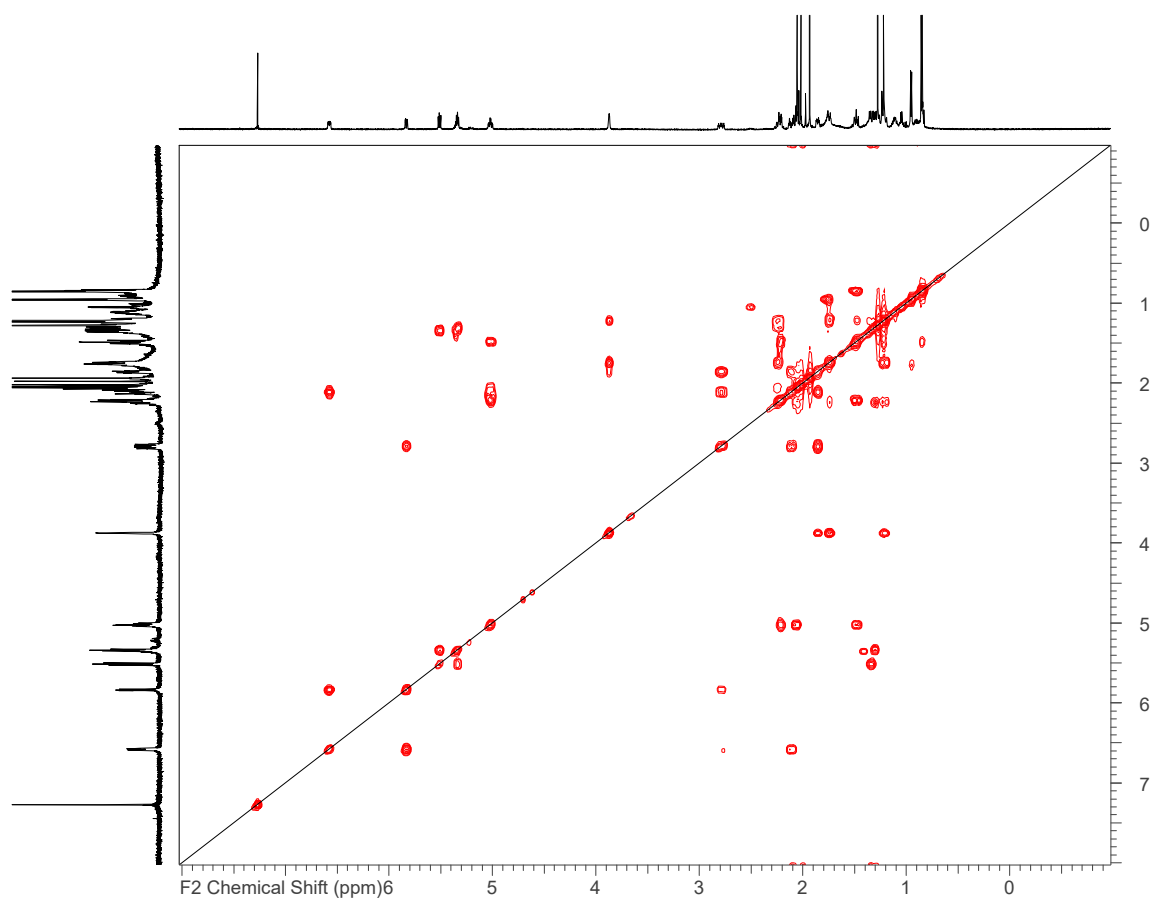

**Figure S20.** COSY spectrum of alcyosterone (**5**), 500 MHz, CDCl<sub>3</sub>.

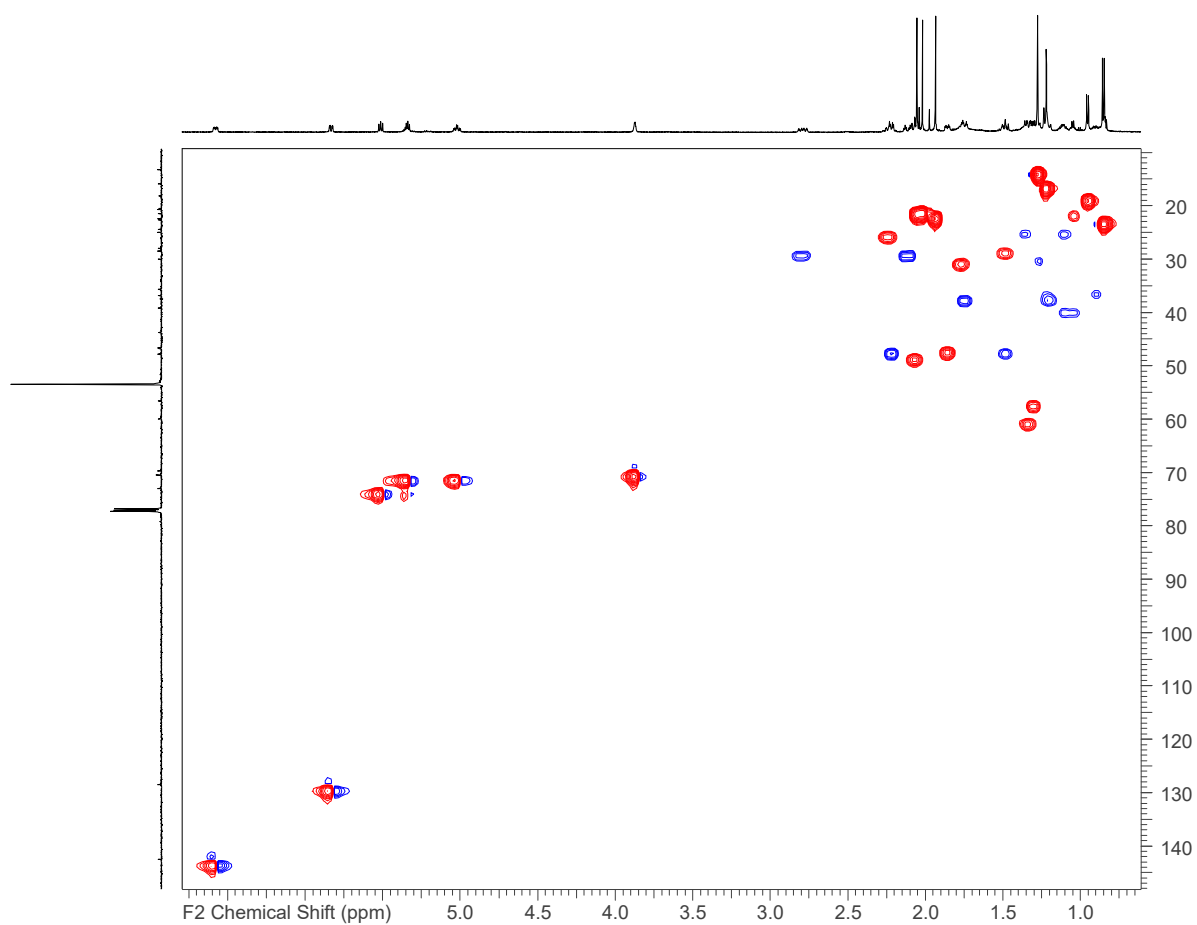

**Figure S21.** HSQC spectrum of alcyosterone (5), 500 MHz,  $\text{CDCl}_3$ .

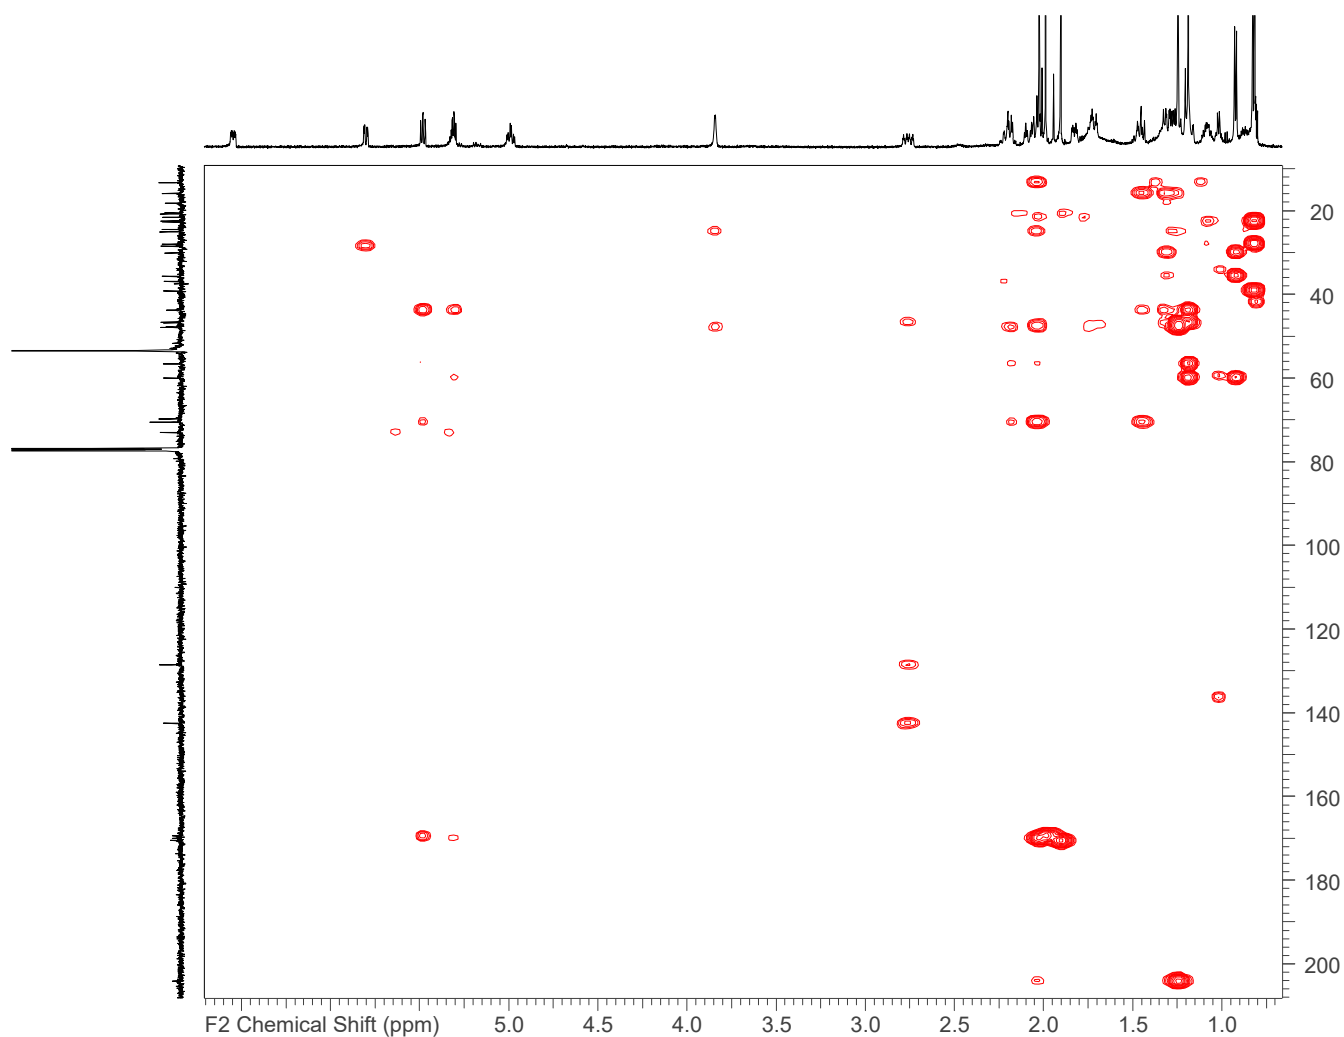

**Figure S22.** HMBC spectrum of alcyosterone (5), 500 MHz,  $\text{CDCl}_3$ .

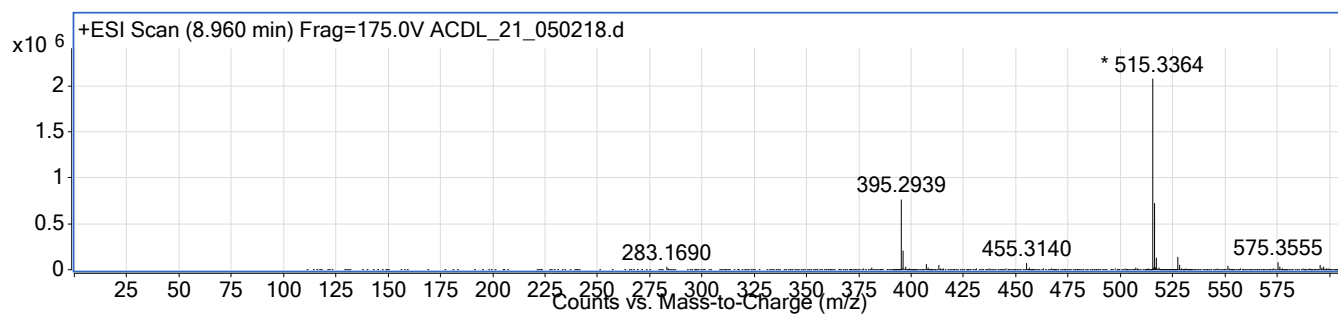

**Figure S23.** HRESIMS of alcyosterone (5). Calculated for  $\text{C}_{33}\text{H}_{51}\text{O}_8$ ,  $m/z$  575.3578 ( $[\text{M} + \text{H}]^+$ ); calculated for  $\text{C}_{31}\text{H}_{47}\text{O}_6$ ,  $m/z$  515.3367 ( $[\text{M} - \text{OAc}]^+$ ); calculated for  $\text{C}_{27}\text{H}_{39}\text{O}_2$ ,  $m/z$  395.2945 ( $[\text{M} - \text{OAc} - 2\text{HOAc}]^+$ ).



**Table S1.** NMR shift comparison between compounds isolated in the current work to those previously published.

| Position              | Alcyopterosin E (2) |            |                      |            | Alcyopterosin L |            |                      |            | Alcyopterosin C |            |                      |            | Alcyopterosin G |            |                      |            | Bis(acetyl)alcyopterosin O |            |                      |            |
|-----------------------|---------------------|------------|----------------------|------------|-----------------|------------|----------------------|------------|-----------------|------------|----------------------|------------|-----------------|------------|----------------------|------------|----------------------------|------------|----------------------|------------|
|                       | This work           |            | Palermo <sup>1</sup> |            | This work       |            | Palermo <sup>1</sup> |            | This work       |            | Palermo <sup>1</sup> |            | This work       |            | Palermo <sup>1</sup> |            | This work                  |            | Carbone <sup>2</sup> |            |
|                       | $\delta_H$          | $\delta_C$ | $\delta_H$           | $\delta_C$ | $\delta_H$      | $\delta_C$ | $\delta_H$           | $\delta_C$ | $\delta_H$      | $\delta_C$ | $\delta_H$           | $\delta_C$ | $\delta_H$      | $\delta_C$ | $\delta_H$           | $\delta_C$ | $\delta_H$                 | $\delta_C$ | $\delta_H$           | $\delta_C$ |
| 1                     | 3.03                | 44.7       | 3.04                 | 45         | 2.92            | 44.0       | 2.92                 | 44.0       | 2.87            | 42.3       | 2.87                 | 42.3       | 2.79            | 46.3       | 2.79                 | 46.3       | 2.72                       | 46.4       | 2.74                 | 46.4       |
|                       |                     |            |                      |            | 3.17            |            | 3.17                 |            |                 |            |                      |            |                 |            |                      |            |                            |            |                      |            |
| 2                     |                     | 148        |                      | 148        |                 | 147.7      |                      | 150.8      |                 | 149.4      |                      | 149.7      |                 | 141.5      |                      | 141.5      |                            | 142.4      |                      | 142.4      |
| 3                     |                     | 122        |                      | 122        |                 | 123.2      |                      | 123.1      |                 | 133.9      |                      | 134.6      |                 | 135.0      |                      | 135.0      |                            | 135.5      |                      | 135.5      |
| 4                     | 4.57                | 76.6       | 4.58                 | 77         | 3.88            | 42.1       | 3.88                 | 42.1       | 4.53            | 70.2       | 4.53                 | 70.6       | 4.60            | 72.6       | 4.60                 | 72.6       | 4.14                       | 63.9       | 4.15                 | 63.9       |
|                       | 5.06                |            | 5.07                 |            | 4.17            |            | 4.18                 |            |                 |            |                      |            |                 |            |                      |            |                            |            |                      |            |
| 5                     | 5.66                | 71.6       | 5.67                 | 72         | 5.70            | 79.6       | 5.70                 | 79.5       | 3.19            | 27.7       | 3.18                 | 27.8       | 3.17            | 26.8       | 3.17                 | 26.8       | 3.03                       | 29.7       | 3.03                 | 29.7       |
| 6                     |                     | 140        |                      | 141        |                 | 139.8      |                      | 139.8      |                 | 138.7      |                      | 139.4      |                 | 130.6      |                      | 130.6      |                            | 132.8      |                      | 132.8      |
| 7                     |                     | 130        |                      | 130        |                 | 130.8      |                      | 130.8      |                 | 136.2      |                      | 136.7      |                 | 135.5      |                      | 135.5      |                            | 130.3      |                      | 130.3      |
| 8                     | 7.27                | 132        | 7.27                 | 132        | 7.47            | 131.8      | 7.48                 | 131.8      | 7.46            | 122.9      | 7.46                 | 123.5      | 7.00            | 127.2      |                      | 127.2      | 7.01                       | 127.7      | 7.01                 | 127.7      |
| 9                     |                     | 142        |                      | 142        |                 | 144.2      |                      | 144.2      |                 | 133.9      |                      | 134.0      |                 | 143.0      |                      | 143.0      |                            | 142.4      |                      | 142.4      |
| 10                    | 2.75                | 47         | 2.75                 | 47         | 4.71            | 82.8       | 4.71                 | 82.8       |                 | 211.0      |                      | 211.4      | 2.70            | 47.7       | 2.70                 | 47.7       | 2.69                       | 47.6       | 2.69                 | 47.6       |
| 11                    |                     | 41.1       |                      | 41         |                 | 45.3       |                      | 45.3       |                 | 45.8       |                      | 45.5       |                 | 39.7       |                      | 39.7       |                            | 39.7       |                      | 39.7       |
| 12                    |                     | 170        |                      | 170        |                 | 169.6      |                      | 169.6      | 2.32            | 15.0       | 2.32                 | 25.4       | 4.69            | 60.4       | 4.69                 | 60.4       | 5.15                       | 62.1       | 5.15                 | 62.1       |
| 13                    | 2.40                | 17.9       | 2.41                 | 18         | 2.40            | 18.0       | 2.40                 | 18.0       | 2.42            | 20.4       | 2.42                 | 20.2       | 2.34            | 19.9       | 2.34                 | 19.9       | 2.35                       | 20.0       | 2.35                 | 20.0       |
| 14                    | 1.19                | 28.7       | 1.19                 | 29         | 1.19            | 26.7       | 1.20                 | 26.7       | 1.23            | 25.2       | 1.23                 | 25.4       | 1.15            | 29.0       | 1.15                 | 29.0       |                            | 29.0       |                      | 29.0       |
| 15                    | 1.15                | 28.7       | 1.16                 | 29         | 1.07            | 21.5       | 1.08                 | 21.4       | 1.23            | 25.2       | 1.23                 | 25.4       | 1.15            | 29.0       | 1.15                 | 29.0       | 1.14                       | 29.0       | 1.14                 | 29.0       |
| 4-CH <sub>2</sub> CO  |                     |            |                      |            |                 |            |                      |            |                 |            |                      |            |                 |            |                      |            | 2.06                       | 21.0       | 2.06                 | 21.0       |
| 4-CH <sub>2</sub> CO  |                     |            |                      |            |                 |            |                      |            |                 |            |                      |            |                 |            |                      |            |                            | 170.6      |                      | 170.6      |
| 12-CH <sub>2</sub> CO |                     |            |                      |            |                 |            |                      |            |                 |            |                      |            |                 |            |                      |            | 2.07                       | 21.0       | 2.07                 | 21.0       |
| 12-CH <sub>2</sub> CO |                     |            |                      |            |                 |            |                      |            |                 |            |                      |            |                 |            |                      |            |                            | 170.9      |                      | 170.9      |

<sup>1</sup>Palermo, J.A.; Brasco, M.F.R.; Spagnuolo, C.; Seldes, A.M. Illudalane sesquiterpenoids from the soft coral *Alcyonium paessleri*: The first natural nitrate esters. *J. Org. Chem.* **2000**, *65*, 4482–4486.

<sup>2</sup>Carbone, M.; Nunez-Pons, L.; Castelluccio, F.; Avila, C.; Gavagnin, M. Illudalane sesquiterpenoids of the alcyopterosin series from the Antarctic marine soft coral *Alcyonium grandis*. *J. Nat. Prod.* **2009**, *72*, 1357–1360

**Table S2.** Crystal data and structure refinement for alcyosterone (5).

|                     |                                                |
|---------------------|------------------------------------------------|
| Identification code | ACDL_21                                        |
| Empirical formula   | C <sub>33</sub> H <sub>50</sub> O <sub>8</sub> |
| Formula weight      | 574.73                                         |
| Temperature/K       | 100.0                                          |
| Crystal system      | orthorhombic                                   |
| Space group         | P2 <sub>1</sub> 2 <sub>1</sub> 2 <sub>1</sub>  |
| a/Å                 | 6.9203(5)                                      |
| b/Å                 | 14.3360(10)                                    |
| c/Å                 | 32.173(2)                                      |
| $\alpha/^\circ$     | 90                                             |
| $\beta/^\circ$      | 90                                             |
| $\gamma/^\circ$     | 90                                             |

|                                               |                                                               |
|-----------------------------------------------|---------------------------------------------------------------|
| Volume/ $\text{\AA}^3$                        | 3191.8(4)                                                     |
| Z                                             | 4                                                             |
| $\rho_{\text{calc}}/\text{cm}^3$              | 1.196                                                         |
| $\mu/\text{mm}^{-1}$                          | 0.681                                                         |
| F(000)                                        | 1248.0                                                        |
| Crystal size/ $\text{mm}^3$                   | $0.042 \times 0.036 \times 0.018$                             |
| Radiation                                     | $\text{CuK}\alpha$ ( $\lambda = 1.54178$ )                    |
| $2\theta$ range for data collection/ $^\circ$ | 5.494 to 137.154                                              |
| Index ranges                                  | $-7 \leq h \leq 8, -16 \leq k \leq 17, -38 \leq l \leq 38$    |
| Reflections collected                         | 32338                                                         |
| Independent reflections                       | 5867 [ $R_{\text{int}} = 0.1453, R_{\text{sigma}} = 0.0776$ ] |
| Data/restraints/parameters                    | 5867/258/437                                                  |
| Goodness-of-fit on $F^2$                      | 1.026                                                         |
| Final R indexes [ $I \geq 2\sigma(I)$ ]       | $R_1 = 0.0659, wR_2 = 0.1389$                                 |
| Final R indexes [all data]                    | $R_1 = 0.1009, wR_2 = 0.1577$                                 |
| Largest diff. peak/hole / $e \text{\AA}^{-3}$ | 0.40/−0.26                                                    |
| Flack parameter                               | −0.10(19)                                                     |

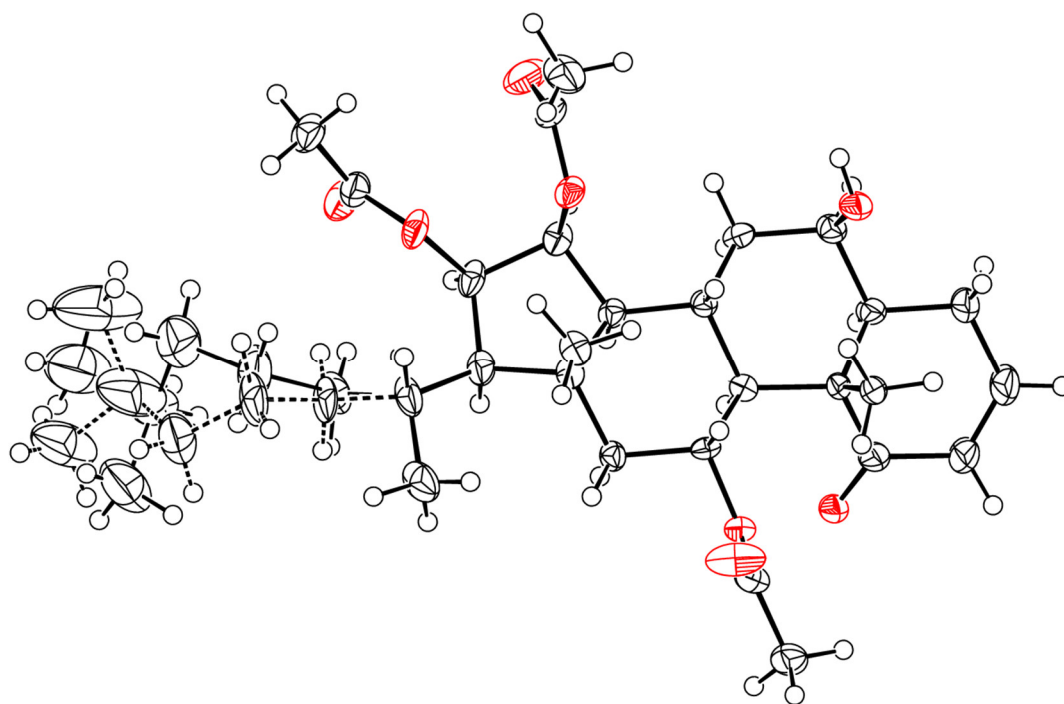

**Figure S24.** Asymmetric unit of alcyosterone (5). Anisotropic displacement parameters drawn at 50% probability level.
